# Supplementary material for: Prospective evaluation of pin site infections in 39 patients treated with external ring fixation
Source: Copernicus journal article supplement (doi:10.5194/jbji-6-135-2021), 2021-04-07
Supplement: Supplementary file [file jbji-6-135-2021-supplement.pdf]

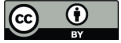

*Supplement of*

## **Prospective evaluation of pin site infections in 39 patients treated with external ring fixation**

**Mats Bue et al.**

*Correspondence to:* Juozas Petruskevicius (juopet@rm.dk)

The copyright of individual parts of the supplement might differ from the article licence.

5 **Supplement**  
Pin site registration sheet.

**Table S1:**

Name of the patient + ID: \_\_\_\_\_

10 Date of primary ring fixation (dd-mm-yy): \_\_\_\_\_

**Follow-up**

|   | <i>Date</i><br>dd/mm-yy | <b>Antibiotics since last visit (Yes/No)</b> | <b>Comments</b><br>(Pin care frequency, Antibiotics, dosage, hospitalisation, other events) |
|---|-------------------------|----------------------------------------------|---------------------------------------------------------------------------------------------|
| 1 |                         |                                              |                                                                                             |
| 2 |                         |                                              |                                                                                             |

15 Name of the patient + ID: \_\_\_\_\_

**Operations**

(primary ring fixation, re-operations, wire/pin removal, removal of rings, etc)

|   | <i>Date</i><br>dd/mm-yy | <b>Comments</b> |
|---|-------------------------|-----------------|
| 1 |                         |                 |
| 2 |                         |                 |

20

25 **Figure S1:**  
Draw the frame on the actual limb and side.

**Anatomical location**

Definition of the rings:

30 Femur: **Distal diaphysis (F-DD)**  
**Distal metaphysis (F-DM)**

Tibia: **Proximal metaphysis (PM)**  
**Prox diaphysis (PD)**  
35 **Distal diaphysis (DD)**  
**Distal metaphysis (DM)**

Foot: Foot frame

40

45

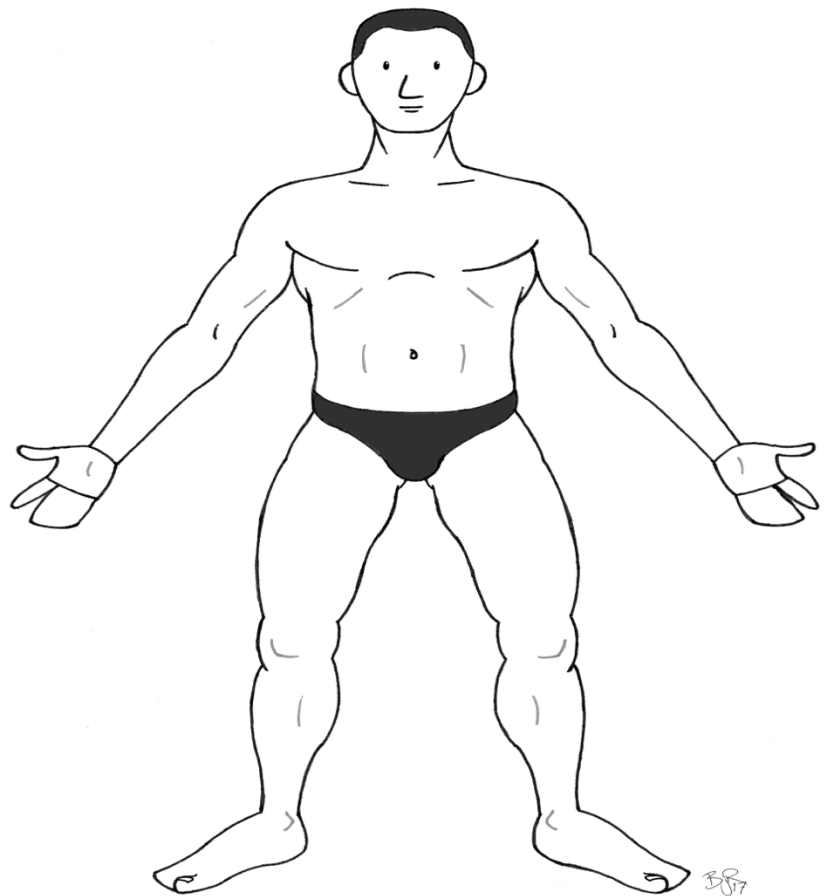

**Table S2:**

50 **Halfpins (HP) and Wires**

- Numbering of the pin sites starts from the most posterior-medial site and continues anti-clockwise on the right extremity (clockwise on left extremity): HP1, HP2 for halfpins, 1M, 2M for wires and so on)
- A wire always has two pin sites: medial and lateral (ex: 2M and 2L).

55 **Registration of pin site infection**

Note the grade of infection (CO 0-6, see at bottom of this sheet) in the empty cells

| Date | Tibia – Prox metaphysis |    |    |    |    |    |    |    | Comments |
|------|-------------------------|----|----|----|----|----|----|----|----------|
|      | 1M                      | 2M | 3M | 4M | 1L | 2L | 3L | 4L |          |
|      |                         |    |    |    |    |    |    |    |          |
|      |                         |    |    |    |    |    |    |    |          |

| Date | Tibia – Prox diaphysis |     |  | Comments |
|------|------------------------|-----|--|----------|
|      | HP1                    | HP2 |  |          |
|      |                        |     |  |          |
|      |                        |     |  |          |

60

| Date | Tibia – Distal diaphysis |     |  | Comments |
|------|--------------------------|-----|--|----------|
|      | HP1                      | HP2 |  |          |
|      |                          |     |  |          |
|      |                          |     |  |          |

| Date | Tibia – Distal metaphysis |    |    |    |    |    |    |    | Comments |
|------|---------------------------|----|----|----|----|----|----|----|----------|
|      | 1M                        | 2M | 3M | 4M | 1L | 2L | 3L | 4L |          |
|      |                           |    |    |    |    |    |    |    |          |
|      |                           |    |    |    |    |    |    |    |          |

65

| Date | Femur – Distal diaphysis |     |    |    | Comments |
|------|--------------------------|-----|----|----|----------|
|      | HP1                      | HP2 | 1M | 1L |          |
|      |                          |     |    |    |          |
|      |                          |     |    |    |          |

| Date | Femur – Distal metaphysis |     |    |    | Comments |
|------|---------------------------|-----|----|----|----------|
|      | HP1                       | HP2 | 1M | 1L |          |
|      |                           |     |    |    |          |
|      |                           |     |    |    |          |

| Date | Footframe |    |    |    |    |    | Comments |
|------|-----------|----|----|----|----|----|----------|
|      | 1M        | 2M | 3M | 3L | 1L | 2L |          |
|      |           |    |    |    |    |    |          |
|      |           |    |    |    |    |    |          |

70

75

**Figure 2S:**  
Femur: distal diaphysis or distal metaphysis with wires and half pins

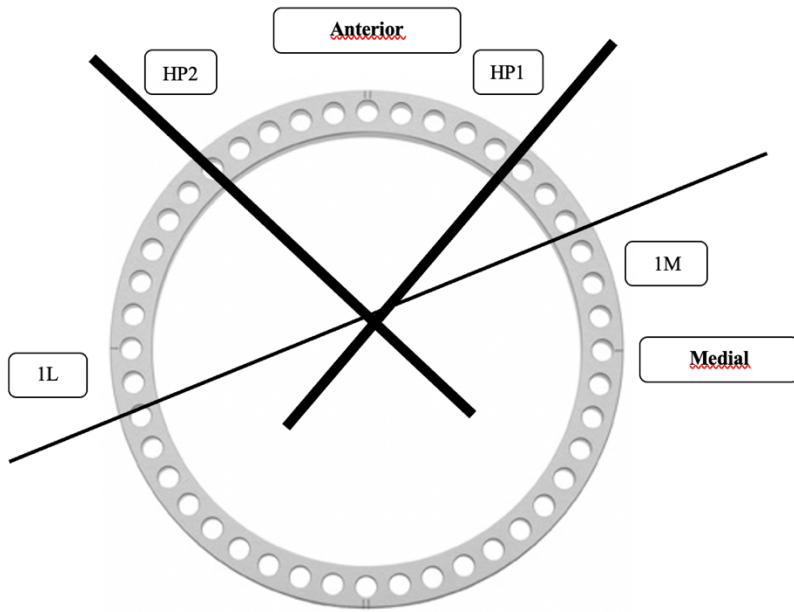

80

85 **Figure 3S:**  
Tibia: proximal/distal metaphysis with wires (standard placement)

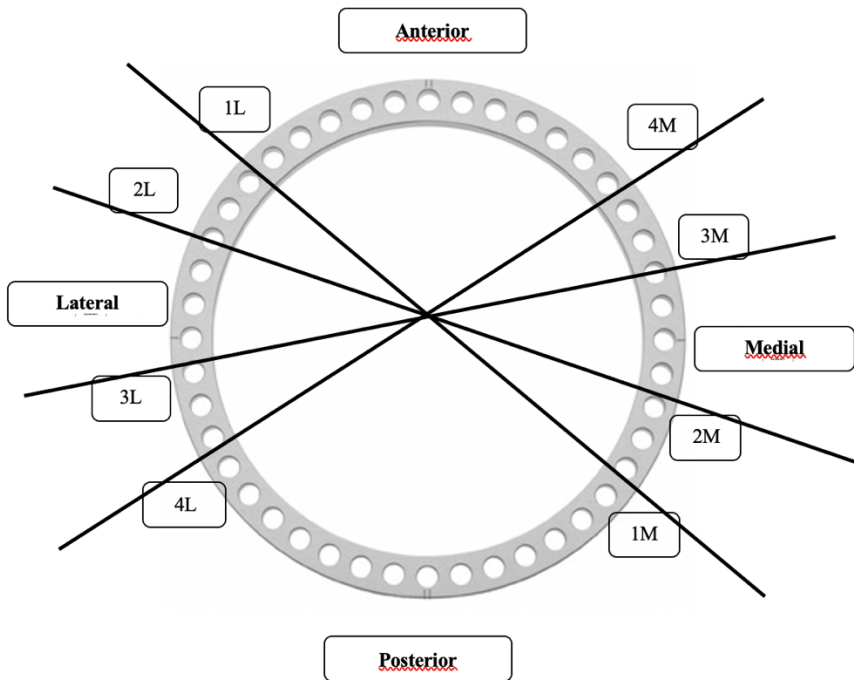

90

**Figure 4S:**  
Tibia: proximal or distal diaphysis with half pins (standard placement)

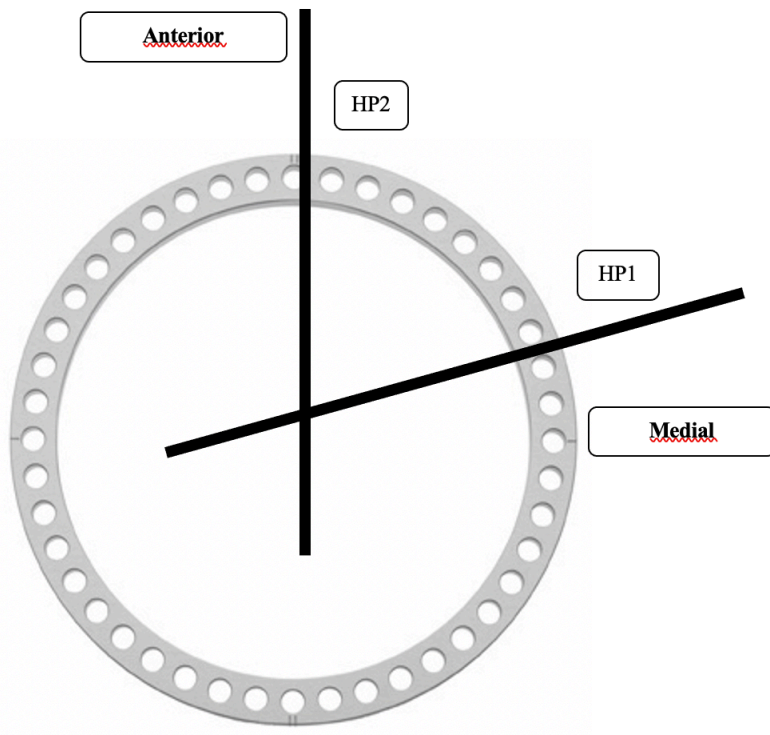

95

**Figure 5S:**  
Footframe: pin sites numbering for standard placement for wires og half pin.

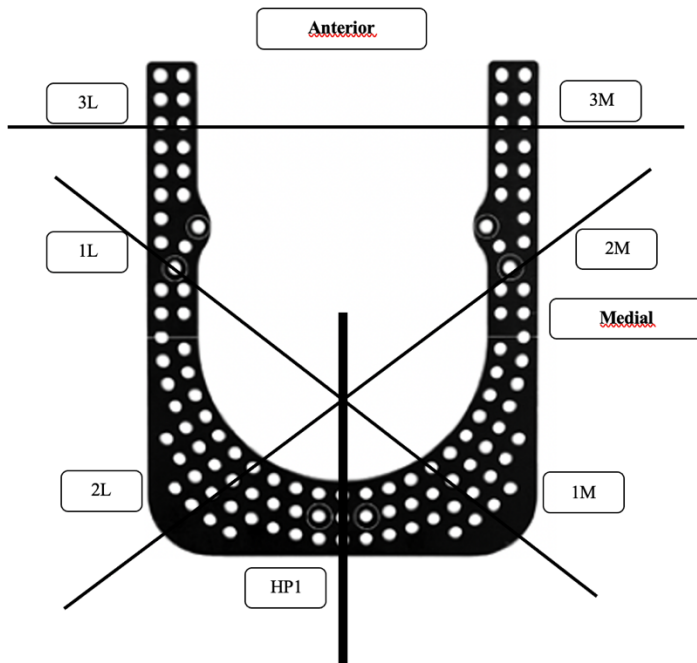

105
